# Supplementary material
Source: ML conference proceedings conference paper supplement (https://proceedings.mlr.press/v37/ammar15.html)
Supplement: Supplementary file 1 [file ammar15-supp.pdf]

---

# Safe Policy Search for Lifelong Reinforcement Learning with Sublinear Regret

## Online Appendix

---

**Haitham Bou Ammar**

HAITHAMB@SEAS.UPENN.EDU

**Rasul Tutunov**

TUTUNOV@SEAS.UPENN.EDU

**Eric Eaton**

EEATON@CIS.UPENN.EDU

University of Pennsylvania, Computer and Information Science Department, Philadelphia, PA 19104 USA

This is the online appendix to the ICML 2015 paper “Safe Policy Search for Lifelong Reinforcement Learning with Sublinear Regret.” Appendix A includes derivations of the update equations for  $\mathbf{L}$  and  $\mathbf{S}$  in the special case of Gaussian policies. Appendix B provides detailed proofs of all lemmas from the main paper, leading to the proof of sublinear regret (Theorem 1).

### A. Update Equations Derivation

In this appendix, we derive the update equations for  $\mathbf{L}$  and  $\mathbf{S}$  in the special case of Gaussian policies. Please note that these derivations can be easily extended to other policy forms in higher dimensional action spaces.

For a task  $t_j$ , the policy  $\pi_{\alpha_{t_j}}^{(t_j)}(\mathbf{u}_m^{(k,t_j)} | \mathbf{x}_m^{(k,t_j)})$  is given by:

$$\pi_{\alpha_{t_j}}^{(t_j)}(\mathbf{u}_m^{(k,t_j)} | \mathbf{x}_m^{(k,t_j)}) = \frac{1}{\sqrt{2\pi\sigma_{t_j}^2}} \exp\left(-\frac{1}{2\sigma_{t_j}^2} \left(\mathbf{u}_m^{(k,t_j)} - (\mathbf{L}\mathbf{s}_{t_j})^\top \Phi(\mathbf{x}_m^{(k,t_j)})\right)^2\right).$$

Therefore, the safe lifelong reinforcement learning optimization objective can be written as:

$$e_r(\mathbf{L}, \mathbf{S}) = \sum_{j=1}^r \frac{\eta_{t_j}}{2\sigma_{t_j}^2 n_{t_j}} \sum_{k=1}^{n_{t_j}} \sum_{m=0}^{M_{t_j}-1} \left(\mathbf{u}_m^{(k,t_j)} - (\mathbf{L}\mathbf{s}_{t_j})^\top \Phi(\mathbf{x}_m^{(k,t_j)})\right)^2 + \mu_1 \|\mathbf{S}\|_F^2 + \mu_2 \|\mathbf{L}\|_F^2. \quad (13)$$

To arrive at the update equations, we need to derive Eq. (13) with respect to each  $\mathbf{L}$  and  $\mathbf{S}$ .

#### A.1. Update Equations for $\mathbf{L}$

Starting with the derivative of  $e_r(\mathbf{L}, \mathbf{S})$  with respect to the shared repository  $\mathbf{L}$ , we can write:

$$\begin{aligned} \nabla_{\mathbf{L}} e_r(\mathbf{L}, \mathbf{S}) &= \nabla_{\mathbf{L}} \left[ \sum_{j=1}^r \frac{\eta_{t_j}}{2\sigma_{t_j}^2 n_{t_j}} \sum_{k=1}^{n_{t_j}} \sum_{m=0}^{M_{t_j}-1} \left(\mathbf{u}_m^{(k,t_j)} - (\mathbf{L}\mathbf{s}_{t_j})^\top \Phi(\mathbf{x}_m^{(k,t_j)})\right)^2 + \mu_1 \|\mathbf{S}\|_F^2 + \mu_2 \|\mathbf{L}\|_F^2 \right] \\ &= - \sum_{j=1}^r \left[ \frac{\eta_{t_j}}{\sigma_{t_j}^2 n_{t_j}} \sum_{k=1}^{n_{t_j}} \sum_{m=0}^{M_{t_j}-1} \left(\mathbf{u}_m^{(k,t_j)} - (\mathbf{L}\mathbf{s}_{t_j})^\top \Phi(\mathbf{x}_m^{(k,t_j)})\right) \Phi(\mathbf{x}_m^{(k,t_j)}) \mathbf{s}_{t_j}^\top \right] + 2\mu_2 \mathbf{L}. \end{aligned}$$

To acquire the minimum, we set the above to zero:

$$\begin{aligned} \sum_{j=1}^r \left[ \frac{\eta_{t_j}}{\sigma_{t_j}^2 n_{t_j}} \sum_{k=1}^{n_{t_j}} \sum_{m=0}^{M_{t_j}-1} \left(\mathbf{u}_m^{(k,t_j)} - (\mathbf{L}\mathbf{s}_{t_j})^\top \Phi(\mathbf{x}_m^{(k,t_j)})\right) \Phi(\mathbf{x}_m^{(k,t_j)}) \mathbf{s}_{t_j}^\top \right] + 2\mu_2 \mathbf{L} &= 0 \\ \sum_{j=1}^r \left[ \frac{\eta_{t_j}}{\sigma_{t_j}^2 n_{t_j}} \sum_{k=1}^{n_{t_j}} \sum_{m=0}^{M_{t_j}-1} \mathbf{s}_{t_j}^\top \mathbf{L}^\top \Phi(\mathbf{x}_m^{(k,t_j)}) \Phi(\mathbf{x}_m^{(k,t_j)}) \mathbf{s}_{t_j}^\top \right] + 2\mu_2 \mathbf{L} &= \sum_{j=1}^r \frac{\eta_{t_j}}{\sigma_{t_j}^2 n_{t_j}} \sum_{k=1}^{n_{t_j}} \sum_{m=0}^{M_{t_j}-1} \mathbf{u}_m^{(k,t_j)} \Phi(\mathbf{x}_m^{(k,t_j)}) \mathbf{s}_{t_j}^\top. \end{aligned}$$

Noting that  $\mathbf{s}_{t_j}^\top \mathbf{L}^\top \Phi(\mathbf{x}_m^{(k,t_j)}) \in \mathbb{R}$ , we can write:

$$\sum_{j=1}^r \left[ \frac{\eta_{t_j}}{\sigma_{t_j}^2 n_{t_j}} \sum_{k=1}^{n_{t_j}} \sum_{m=0}^{M_{t_j}-1} \Phi(\mathbf{x}_m^{(k,t_j)}) \mathbf{s}_{t_j}^\top \Phi^\top(\mathbf{x}_m^{(k,t_j)}) \mathbf{L} \mathbf{s}_{t_j} \right] + 2\mu_2 \mathbf{L} = \sum_{j=1}^r \frac{\eta_{t_j}}{\sigma_{t_j}^2 n_{t_j}} \sum_{k=1}^{n_{t_j}} \sum_{m=0}^{M_{t_j}-1} \mathbf{u}_m^{(k,t_j)} \Phi(\mathbf{x}_m^{(k,t_j)}) \mathbf{s}_{t_j}^\top. \quad (14)$$

To solve Eq. (14), we introduce the standard  $\text{vec}(\cdot)$  operator leading to:

$$\begin{aligned} \text{vec} \left( \sum_{j=1}^r \left[ \frac{\eta_{t_j}}{\sigma_{t_j}^2 n_{t_j}} \sum_{k=1}^{n_{t_j}} \sum_{m=0}^{M_{t_j}-1} \Phi(\mathbf{x}_m^{(k,t_j)}) \mathbf{s}_{t_j}^\top \Phi^\top(\mathbf{x}_m^{(k,t_j)}) \mathbf{L} \mathbf{s}_{t_j} \right] + 2\mu_2 \mathbf{L} \right) \\ = \text{vec} \left( \sum_{j=1}^r \frac{\eta_{t_j}}{\sigma_{t_j}^2 n_{t_j}} \sum_{k=1}^{n_{t_j}} \sum_{m=0}^{M_{t_j}-1} \mathbf{u}_m^{(k,t_j)} \Phi(\mathbf{x}_m^{(k,t_j)}) \mathbf{s}_{t_j}^\top \right) \\ \sum_{j=1}^r \frac{\eta_{t_j}}{\sigma_{t_j}^2 n_{t_j}} \sum_{k=1}^{n_{t_j}} \sum_{m=0}^{M_{t_j}-1} \text{vec} \left( \Phi(\mathbf{x}_m^{(k,t_j)}) \mathbf{s}_{t_j}^\top \right) \text{vec} \left( \Phi^\top(\mathbf{x}_m^{(k,t_j)}) \mathbf{L} \mathbf{s}_{t_j} \right) + 2\mu_2 \text{vec}(\mathbf{L}) \\ = \sum_{j=1}^r \frac{\eta_{t_j}}{\sigma_{t_j}^2 n_{t_j}} \sum_{k=1}^{n_{t_j}} \sum_{m=0}^{M_{t_j}-1} \text{vec} \left( \mathbf{u}_m^{(k,t_j)} \Phi(\mathbf{x}_m^{(k,t_j)}) \mathbf{s}_{t_j}^\top \right). \end{aligned}$$

Knowing that for a given set of matrices  $\mathbf{A}$ ,  $\mathbf{B}$ , and  $\mathbf{X}$ ,  $\text{vec}(\mathbf{AXB}) = (\mathbf{B}^\top \otimes \mathbf{A}) \text{vec}(\mathbf{X})$ , we can write

$$\begin{aligned} \sum_{j=1}^r \frac{\eta_{t_j}}{\sigma_{t_j}^2 n_{t_j}} \sum_{k=1}^{n_{t_j}} \sum_{m=0}^{M_{t_j}-1} \text{vec} \left( \Phi(\mathbf{x}_m^{(k,t_j)}) \mathbf{s}_{t_j}^\top \right) \left( \mathbf{s}_{t_j}^\top \otimes \Phi^\top(\mathbf{x}_m^{(k,t_j)}) \right) \text{vec}(\mathbf{L}) + 2\mu_2 \text{vec}(\mathbf{L}) \\ = \sum_{j=1}^r \frac{\eta_{t_j}}{\sigma_{t_j}^2 n_{t_j}} \sum_{k=1}^{n_{t_j}} \sum_{m=0}^{M_{t_j}-1} \text{vec} \left( \mathbf{u}_m^{(k,t_j)} \Phi(\mathbf{x}_m^{(k,t_j)}) \mathbf{s}_{t_j}^\top \right). \end{aligned}$$

By choosing  $\mathbf{Z}_L = 2\mu_2 \mathbf{I}_{dk \times dk} + \sum_{j=1}^r \frac{\eta_{t_j}}{n_{t_j} \sigma_{t_j}^2} \sum_{k=1}^{n_{t_j}} \sum_{m=0}^{M_{t_j}-1} \text{vec} \left( \Phi(\mathbf{x}_m^{(k,t_j)}) \mathbf{s}_{t_j}^\top \right) \left( \Phi(\mathbf{x}_m^{(k,t_j)}) \otimes \mathbf{s}_{t_j}^\top \right)$ , and  $\mathbf{v}_L = \sum_{j=1}^r \frac{\eta_{t_j}}{n_{t_j} \sigma_{t_j}^2} \sum_{k=1}^{n_{t_j}} \sum_{m=0}^{M_{t_j}-1} \text{vec} \left( \mathbf{u}_m^{(k,t_j)} \Phi(\mathbf{x}_m^{(k,t_j)}) \mathbf{s}_{t_j}^\top \right)$ , we can update  $\mathbf{L} = \mathbf{Z}_L^{-1} \mathbf{v}_L$ .

## A.2. Update Equations for $\mathbf{S}$

To derive the update equations with respect to  $\mathbf{S}$ , similar approach to that of  $\mathbf{L}$  can be followed. The derivative of  $e_r(\mathbf{L}, \mathbf{S})$  with respect to  $\mathbf{S}$  can be computed column-wise for all tasks observed so far:

$$\begin{aligned} \nabla_{\mathbf{s}_{t_j}} e_r(\mathbf{L}, \mathbf{S}) &= \nabla_{\mathbf{s}_{t_j}} \left[ \sum_{j=1}^r \frac{\eta_{t_j}}{2\sigma_{t_j}^2 n_{t_j}} \sum_{k=1}^{n_{t_j}} \sum_{m=0}^{M_{t_j}-1} \left( \mathbf{u}_m^{(k,t_j)} - (\mathbf{L} \mathbf{s}_{t_j})^\top \Phi(\mathbf{x}_m^{(k,t_j)}) \right)^2 + \mu_1 \|\mathbf{S}\|_F^2 + \mu_2 \|\mathbf{L}\|_F^2 \right] \\ &= - \sum_{t_k=t_j} \left[ \frac{\eta_{t_j}}{\sigma_{t_j}^2 n_{t_j}} \sum_{k=1}^{n_{t_j}} \sum_{m=0}^{M_{t_j}-1} \left( \mathbf{u}_m^{(k,t_j)} - (\mathbf{L} \mathbf{s}_{t_j})^\top \Phi(\mathbf{x}_m^{(k,t_j)}) \right) \mathbf{L}^\top \Phi(\mathbf{x}_m^{(k,t_j)}) \right] + 2\mu_2 \mathbf{s}_{t_j}. \end{aligned}$$

Using a similar analysis to the previous section, choosing

$$\begin{aligned} \mathbf{Z}_{\mathbf{s}_{t_j}} &= 2\mu_1 \mathbf{I}_{k \times k} + \sum_{t_k=t_j} \frac{\eta_{t_j}}{n_{t_j} \sigma_{t_j}^2} \sum_{k=1}^{n_{t_j}} \sum_{m=0}^{M_{t_j}-1} \mathbf{L}^\top \Phi(\mathbf{x}_m^{(k,t_j)}) \Phi^\top(\mathbf{x}_m^{(k,t_j)}) \mathbf{L}, \\ \mathbf{v}_{\mathbf{s}_{t_j}} &= \sum_{t_k=t_j} \frac{\eta_{t_j}}{n_{t_j} \sigma_{t_j}^2} \sum_{k=1}^{n_{t_j}} \sum_{m=0}^{M_{t_j}-1} \mathbf{u}_m^{(k,t_j)} \mathbf{L}^\top \Phi(\mathbf{x}_m^{(k,t_j)}), \end{aligned}$$

we can update  $\mathbf{s}_{t_j} = \mathbf{Z}_{\mathbf{s}_{t_j}}^{-1} \mathbf{v}_{\mathbf{s}_{t_j}}$ .

## B. Proofs of Theoretical Guarantees

In this appendix, we prove the claims and lemmas from the main paper, leading to sublinear regret (Theorem 1).

**Lemma 1.** Assume the policy for a task  $t_j$  at a round  $r$  to be given by  $\pi_{\alpha_{t_j}^{(t_j)}}(\mathbf{u}_m^{(k, t_j)} | \mathbf{x}_m^{(k, t_j)}) \Big|_{\hat{\theta}_r} = \mathcal{N}\left(\alpha_{t_j}^\top \Big|_{\hat{\theta}_r}, \Phi(\mathbf{x}_m^{(k, t_j)}), \sigma_{t_j}\right)$ , for  $\mathbf{x}_m^{(k, t_j)} \in \mathcal{X}_{t_j}$  and  $\mathbf{u}_m^{(k, t_j)} \in \mathcal{U}_{t_j}$  with  $\mathcal{X}_{t_j}$  and  $\mathcal{U}_{t_j}$  representing the state and action spaces, respectively. The gradient  $\nabla_{\alpha_{t_j} l_{t_j}}(\alpha_{t_j}) \Big|_{\hat{\theta}_r}$ , for  $l_{t_j}(\alpha_{t_j}) = -1/n_{t_j} \sum_{k=1}^{n_{t_j}} \sum_{m=0}^{M_{t_j}-1} \log \left[ \pi_{\alpha_{t_j}^{(t_j)}}(\mathbf{u}_m^{(k, t_j)} | \mathbf{x}_m^{(k, t_j)}) \right]$  satisfies

$$\left\| \nabla_{\alpha_{t_j} l_{t_j}}(\alpha_{t_j}) \Big|_{\hat{\theta}_r} \right\|_2 \leq \frac{M_{t_j}}{\sigma_{t_j}^2} \left[ \left( u_{\max} + \max_{t_k \in \mathcal{I}_{r-1}} \{ \| \mathbf{A}_{t_k}^+ \|_2 (\| \mathbf{b}_{t_k} \|_2 + \mathbf{c}_{\max}) \} \Phi_{\max} \right) \Phi_{\max} \right],$$

with  $u_{\max} = \max_{k,m} \{ \| \mathbf{u}_m^{(k, t_j)} \| \}$  and  $\Phi_{\max} = \max_{k,m} \{ \| \Phi(\mathbf{x}_m^{(k, t_j)}) \| \}$  for all trajectories and all tasks.

*Proof.* The proof of the above lemma will be provided as a collection of claims. We start with the following:

Claim: Given  $\pi_{\alpha_{t_j}^{(t_j)}}(\mathbf{u}_m^{(k)} | \mathbf{x}_m^{(k)}) \Big|_{\hat{\theta}_r} = \mathcal{N}\left(\alpha_{t_j}^\top \Big|_{\hat{\theta}_r}, \Phi(\mathbf{x}_m^{(k, t_j)}), \sigma_{t_j}\right)$ , for  $\mathbf{x}_m^{(k, t_j)} \in \mathcal{X}_{t_j}$  and  $\mathbf{u}_m^{(k, t_j)} \in \mathcal{U}_{t_j}$ , and  $l_{t_j}(\alpha_{t_j}) = -1/n_{t_j} \sum_{k=1}^{n_{t_j}} \sum_{m=0}^{M_{t_j}-1} \log \left[ \pi_{\alpha_{t_j}^{(t_j)}}(\mathbf{u}_m^{(k, t_j)} | \mathbf{x}_m^{(k, t_j)}) \right]$ ,  $\left\| \nabla_{\alpha_{t_j} l_{t_j}}(\alpha_{t_j}) \Big|_{\hat{\theta}_r} \right\|_2$  satisfies

$$\left\| \nabla_{\alpha_{t_j} l_{t_j}}(\alpha_{t_j}) \Big|_{\hat{\theta}_r} \right\|_2 \leq \frac{M_{t_j}}{\sigma_{t_j}^2} \left[ \left( u_{\max} + \left\| \alpha_{t_j} \Big|_{\hat{\theta}_r} \right\|_2 \Phi_{\max} \right) \Phi_{\max} \right]. \quad (15)$$

Proof: Since  $\pi_{\alpha_{t_j}^{(t_j)}}(\mathbf{u}_m^{(k, t_j)} | \mathbf{x}_m^{(k, t_j)}) \Big|_{\hat{\theta}_r} = \mathcal{N}\left(\alpha_{t_j}^\top \Big|_{\hat{\theta}_r}, \Phi(\mathbf{x}_m^{(k, t_j)}), \sigma_{t_j}\right)$ , we can write

$$\log \left[ \pi_{\alpha_{t_j}^{(t_j)}}(\mathbf{u}_m^{(k, t_j)} | \mathbf{x}_m^{(k, t_j)}) \Big|_{\hat{\theta}_r} \right] = -\log \left[ \sqrt{2\pi\sigma_{t_j}^2} \right] - \frac{1}{2\sigma_{t_j}^2} \left( \mathbf{u}_m^{(k, t_j)} - \alpha_{t_j}^\top \Big|_{\hat{\theta}_r} \Phi(\mathbf{x}_m^{(k, t_j)}) \right)^2.$$

Therefore:

$$\begin{aligned} \nabla_{\alpha_{t_j} l_{t_j}}(\alpha_{t_j}) \Big|_{\hat{\theta}_r} &= -\frac{1}{n_{t_j}} \sum_{k=1}^{n_{t_j}} \sum_{m=0}^{M_{t_j}-1} \frac{1}{\sigma_{t_j}^2} \left( \mathbf{u}_m^{(k, t_j)} - \alpha_{t_j}^\top \Big|_{\hat{\theta}_r} \Phi(\mathbf{x}_m^{(k, t_j)}) \right) \Phi(\mathbf{x}_m^{(k, t_j)}) \\ \left\| \nabla_{\alpha_{t_j} l_{t_j}}(\alpha_{t_j}) \Big|_{\hat{\theta}_r} \right\|_2 &\leq \frac{M_{t_j}}{\sigma_{t_j}^2} \left[ \max_{k,m} \left\{ \left| \mathbf{u}_m^{(k, t_j)} - \alpha_{t_j}^\top \Big|_{\hat{\theta}_r} \Phi(\mathbf{x}_m^{(k, t_j)}) \right| \times \left\| \Phi(\mathbf{x}_m^{(k, t_j)}) \right\|_2 \right\} \right] \\ &\leq \frac{M_{t_j}}{\sigma_{t_j}^2} \left[ \max_{k,m} \left\{ \left| \mathbf{u}_m^{(k, t_j)} \right| \times \left\| \Phi(\mathbf{x}_m^{(k, t_j)}) \right\|_2 \right\} \right. \\ &\quad \left. + \max_{k,m} \left\{ \left| \alpha_{t_j}^\top \Big|_{\hat{\theta}_r} \Phi(\mathbf{x}_m^{(k, t_j)}) \right| \times \left\| \Phi(\mathbf{x}_m^{(k, t_j)}) \right\|_2 \right\} \right] \\ &\leq \frac{M_{t_j}}{\sigma_{t_j}^2} \left[ \max_{k,m} \left\{ \left| \mathbf{u}_m^{(k, t_j)} \right| \right\} \max_{k,m} \left\{ \left\| \Phi(\mathbf{x}_m^{(k, t_j)}) \right\|_2 \right\} \right. \\ &\quad \left. + \max_{k,m} \left\{ \left| \left\langle \alpha_{t_j} \Big|_{\hat{\theta}_r}, \Phi(\mathbf{x}_m^{(k, t_j)}) \right\rangle \right\} \max_{k,m} \left\{ \left\| \Phi(\mathbf{x}_m^{(k, t_j)}) \right\|_2 \right\} \right]. \end{aligned}$$

Denoting  $\max_{k,m} \left\{ \left| \mathbf{u}_m^{(k, t_j)} \right| \right\} = u_{\max}$  and  $\max_{k,m} \left\{ \left\| \Phi(\mathbf{x}_m^{(k, t_j)}) \right\|_2 \right\} = \Phi_{\max}$  for all trajectories and all tasks, we can write

$$\left\| \nabla_{\alpha_{t_j} l_{t_j}}(\alpha_{t_j}) \Big|_{\hat{\theta}_r} \right\|_2 \leq \frac{M_{t_j}}{\sigma_{t_j}^2} \left[ \left( u_{\max} + \max_{k,m} \left\{ \left| \left\langle \alpha_{t_j} \Big|_{\hat{\theta}_r}, \Phi(\mathbf{x}_m^{(k, t_j)}) \right\rangle \right\} \right) \Phi_{\max} \right].$$

Using the Cauchy-Shwarz inequality (Horn & Mathias, 1990), we can upper bound  $\max_{k,m} \left\{ \left| \left\langle \alpha_{t_j} \Big|_{\hat{\theta}_r}, \Phi(\mathbf{x}_m^{(k, t_j)}) \right\rangle \right\}$

as

$$\begin{aligned} \max_{k,m} \left\{ \left| \left\langle \boldsymbol{\alpha}_{t_j} \Big|_{\hat{\boldsymbol{\theta}}_r}, \boldsymbol{\Phi} \left( \mathbf{x}_m^{(k, t_j)} \right) \right\rangle \right| \right\} &\leq \max_{k,m} \left\{ \left\| \boldsymbol{\alpha}_{t_j} \Big|_{\hat{\boldsymbol{\theta}}_r} \right\|_2 \left\| \boldsymbol{\Phi} \left( \mathbf{x}_m^{(k, t_j)} \right) \right\|_2 \right\} \leq \max_{k,m} \left\{ \left\| \boldsymbol{\alpha}_{t_j} \Big|_{\hat{\boldsymbol{\theta}}_r} \right\|_2 \right\} \Phi_{\max} \\ &\leq \left\| \boldsymbol{\alpha}_{t_j} \Big|_{\hat{\boldsymbol{\theta}}_r} \right\|_2 \Phi_{\max} . \end{aligned}$$

Finalizing the statement of the claim, the overall bound on the norm of the gradient of  $l_{t_j}(\boldsymbol{\alpha}_{t_j})$  can be written as

$$\left\| \nabla_{\boldsymbol{\alpha}_{t_j}} l_{t_j}(\boldsymbol{\alpha}_{t_j}) \Big|_{\hat{\boldsymbol{\theta}}_r} \right\|_2 \leq \frac{M_{t_j}}{\sigma_{t_j}^2} \left[ \left( u_{\max} + \left\| \boldsymbol{\alpha}_{t_j} \Big|_{\hat{\boldsymbol{\theta}}_r} \right\|_2 \Phi_{\max} \right) \Phi_{\max} \right] . \quad (16)$$

■

Claim: The norm of the gradient of the loss function satisfies:

$$\left\| \nabla_{\boldsymbol{\alpha}_{t_j}} l_{t_j}(\boldsymbol{\alpha}_{t_j}) \Big|_{\hat{\boldsymbol{\theta}}_r} \right\|_2 \leq \frac{M_{t_j}}{\sigma_{t_j}^2} \left[ \left( u_{\max} + \max_{t_k \in \mathcal{I}_{r-1}} \{ \| \mathbf{A}_{t_k}^+ \|_2 (\| \mathbf{b}_{t_k} \|_2 + \mathbf{c}_{\max}) \} \Phi_{\max} \right) \Phi_{\max} \right] .$$

Proof: As mentioned previously, we consider the linearization of the loss function  $l_{t_j}$  around the constraint solution of the previous round,  $\hat{\boldsymbol{\theta}}_r$ . Since  $\hat{\boldsymbol{\theta}}_r$  satisfies  $\mathbf{A}_{t_k} \boldsymbol{\alpha}_{t_k} = \mathbf{b}_{t_k} - \mathbf{c}_{t_k}, \forall t_k \in \mathcal{I}_{r-1}$ . Hence, we can write

$$\begin{aligned} \mathbf{A}_{t_k} \boldsymbol{\alpha}_{t_k} + \mathbf{c}_{t_k} &= \mathbf{b}_{t_k} \quad \forall t_k \in \mathcal{I}_{r-1} \\ \implies \boldsymbol{\alpha}_{t_k} &= \mathbf{A}_{t_k}^+ (\mathbf{b}_{t_k} - \mathbf{c}_{t_k}) \quad \text{with } \mathbf{A}_{t_k}^+ = (\mathbf{A}_{t_k}^\top \mathbf{A}_{t_k})^{-1} \mathbf{A}_{t_k}^\top \text{ being the left pseudo-inverse.} \end{aligned}$$

Therefore

$$\begin{aligned} \|\boldsymbol{\alpha}_{t_k}\|_2 &\leq \|\mathbf{A}_{t_k}^+\|_2 (\|\mathbf{b}_{t_k}\|_2 + \|\mathbf{c}_{t_k}\|_2) \\ &\leq \|\mathbf{A}_{t_k}^+\|_2 (\|\mathbf{b}_{t_k}\|_2 + \mathbf{c}_{\max}) . \end{aligned}$$

Combining the above results with those of Eq. (16) we arrive at

$$\left\| \nabla_{\boldsymbol{\alpha}_{t_j}} l_{t_j}(\boldsymbol{\alpha}_{t_j}) \Big|_{\hat{\boldsymbol{\theta}}_r} \right\|_2 \leq \frac{M_{t_j}}{\sigma_{t_j}^2} \left[ \left( u_{\max} + \max_{t_k \in \mathcal{I}_{r-1}} \{ \|\mathbf{A}_{t_k}^+\|_2 (\|\mathbf{b}_{t_k}\|_2 + \mathbf{c}_{\max}) \} \Phi_{\max} \right) \Phi_{\max} \right] .$$

■

The previous result finalizes the statement of the lemma, bounding the gradient of the loss function in terms of the *safety* constraints. □

**Lemma 2.** *The norm of the gradient of the loss function evaluated at  $\hat{\boldsymbol{\theta}}_r$  satisfies*

$$\left\| \nabla_{\boldsymbol{\theta}} l_{t_j}(\boldsymbol{\theta}) \Big|_{\hat{\boldsymbol{\theta}}_r} \right\|_2^2 \leq \left\| \nabla_{\boldsymbol{\alpha}_{t_j}} l_{t_j}(\boldsymbol{\theta}) \Big|_{\hat{\boldsymbol{\theta}}_r} \right\|_2^2 \left( q \times d \left( \frac{2d}{p^2} \max_{t_k \in \mathcal{I}_{r-1}} \left\{ \|\mathbf{A}_{t_k}^+\|_2^2 (\|\mathbf{b}_{t_k}\|_2^2 + \mathbf{c}_{\max}^2) \right\} + 1 \right) \right) .$$

*Proof.* The derivative of  $l_{t_j}(\boldsymbol{\theta})|_{\hat{\boldsymbol{\theta}}_r}$  can be written as

$$\begin{aligned} \nabla_{\boldsymbol{\theta}} l_{t_j}(\boldsymbol{\theta})|_{\hat{\boldsymbol{\theta}}_r} &= \begin{bmatrix} \nabla_{\boldsymbol{\alpha}_{t_j}} l_{t_j}^{\top}(\boldsymbol{\theta})|_{\hat{\boldsymbol{\theta}}_r} \begin{bmatrix} \frac{\partial \boldsymbol{\alpha}_{t_j}^{(1)}}{\partial \boldsymbol{\theta}_1}|_{\hat{\boldsymbol{\theta}}_r} \\ \vdots \\ \frac{\partial \boldsymbol{\alpha}_{t_j}^{(d)}}{\partial \boldsymbol{\theta}_1}|_{\hat{\boldsymbol{\theta}}_r} \end{bmatrix} \\ \vdots \\ \nabla_{\boldsymbol{\alpha}_{t_j}} l_{t_j}^{\top}(\boldsymbol{\theta})|_{\hat{\boldsymbol{\theta}}_r} \begin{bmatrix} \frac{\partial \boldsymbol{\alpha}_{t_j}^{(1)}}{\partial \boldsymbol{\theta}_{dk+k|\mathcal{T}|}}|_{\hat{\boldsymbol{\theta}}_r} \\ \vdots \\ \frac{\partial \boldsymbol{\alpha}_{t_j}^{(d)}}{\partial \boldsymbol{\theta}_{dk+k|\mathcal{T}|}}|_{\hat{\boldsymbol{\theta}}_r} \end{bmatrix} \end{bmatrix} = \begin{bmatrix} \nabla_{\boldsymbol{\alpha}_{t_j}} l_{t_j}^{\top}(\boldsymbol{\theta})|_{\hat{\boldsymbol{\theta}}_r} \begin{bmatrix} \boldsymbol{\theta}_{dk+1}|_{\hat{\boldsymbol{\theta}}_r} \\ 0 \\ \vdots \\ 0 \end{bmatrix} \\ \vdots \\ \nabla_{\boldsymbol{\alpha}_{t_j}} l_{t_j}^{\top}(\boldsymbol{\theta})|_{\hat{\boldsymbol{\theta}}_r} \begin{bmatrix} 0 \\ \vdots \\ \boldsymbol{\theta}_{(d+1)k+1}|_{\hat{\boldsymbol{\theta}}_r} \end{bmatrix} \\ \vdots \\ \nabla_{\boldsymbol{\alpha}_{t_j}} l_{t_j}^{\top}(\boldsymbol{\theta})|_{\hat{\boldsymbol{\theta}}_r} \begin{bmatrix} \boldsymbol{\theta}_{d(k+1)+1}|_{\hat{\boldsymbol{\theta}}_r} \\ \vdots \\ \boldsymbol{\theta}_{dk}|_{\hat{\boldsymbol{\theta}}_r} \end{bmatrix} \end{bmatrix} \\ \Rightarrow \left\| \nabla_{\boldsymbol{\theta}} l_{t_j}(\boldsymbol{\theta})|_{\hat{\boldsymbol{\theta}}_r} \right\|_2^2 &\leq \left\| \nabla_{\boldsymbol{\alpha}_{t_j}} l_{t_j}(\boldsymbol{\alpha}_{t_j})|_{\hat{\boldsymbol{\theta}}_r} \right\|_2^2 \left[ d \left\| \mathbf{s}_{t_j}|_{\hat{\boldsymbol{\theta}}_r} \right\|_2^2 + \left\| \mathbf{L}|_{\hat{\boldsymbol{\theta}}_r} \right\|_{\text{F}}^2 \right]. \end{aligned}$$

The results of Lemma 1 bound  $\left\| \nabla_{\boldsymbol{\alpha}_{t_j}} l_{t_j}(\boldsymbol{\theta})|_{\hat{\boldsymbol{\theta}}_r} \right\|_2^2$ .

Now, we target to bound each of  $\left\| \mathbf{s}_{t_j}|_{\hat{\boldsymbol{\theta}}_r} \right\|_2^2$  and  $\left\| \mathbf{L}|_{\hat{\boldsymbol{\theta}}_r} \right\|_{\text{F}}^2$ .

**Bounding  $\left\| \mathbf{s}_{t_j}|_{\hat{\boldsymbol{\theta}}_r} \right\|_2^2$  and  $\left\| \mathbf{L}|_{\hat{\boldsymbol{\theta}}_r} \right\|_{\text{F}}^2$ :** Considering the constraint  $\mathbf{A}_{t_j} \mathbf{L} \mathbf{s}_{t_j} + \mathbf{c}_{t_j} = \mathbf{b}_{t_j}$  for a task  $t_j$ , we realize that  $\mathbf{s}_{t_j} = \mathbf{L}^+ \left( \mathbf{A}_{t_j}^+ (\mathbf{b}_{t_j} - \mathbf{c}_{t_j}) \right)$ . Therefore,

$$\left\| \mathbf{s}_{t_j}|_{\hat{\boldsymbol{\theta}}_r} \right\|_2 \leq \left\| \mathbf{L}^+ \left( \mathbf{A}_{t_j}^+ (\mathbf{b}_{t_j} - \mathbf{c}_{t_j}) \right) \right\|_2 \leq \left\| \mathbf{L}^+ \right\|_2 \left\| \mathbf{A}_{t_j}^+ \right\|_2 \left( \left\| \mathbf{b}_{t_j} \right\|_2 + \left\| \mathbf{c}_{t_j} \right\|_2 \right). \quad (17)$$

Noting that

$$\begin{aligned} \left\| \mathbf{L}^+ \right\|_2 &= \left\| (\mathbf{L}^{\top} \mathbf{L})^{-1} \mathbf{L}^{\top} \right\|_2 \leq \left\| (\mathbf{L}^{\top} \mathbf{L})^{-1} \right\|_2 \left\| \mathbf{L}^{\top} \right\|_2 \leq \left\| (\mathbf{L}^{\top} \mathbf{L})^{-1} \right\|_2 \left\| \mathbf{L}^{\top} \right\|_{\text{F}} \\ &= \left\| (\mathbf{L}^{\top} \mathbf{L})^{-1} \right\|_2 \left\| \mathbf{L} \right\|_{\text{F}}. \end{aligned}$$

To relate  $\left\| \mathbf{L}^+ \right\|_2$  to  $\left\| \mathbf{L} \right\|_{\text{F}}$ , we need to bound  $\left\| (\mathbf{L}^{\top} \mathbf{L})^{-1} \right\|_2$  in terms of  $\left\| \mathbf{L} \right\|_{\text{F}}$ . Denoting the spectrum of  $\mathbf{L}^{\top} \mathbf{L}$  as  $\text{spec}(\mathbf{L}^{\top} \mathbf{L}) = \{\lambda_1, \dots, \lambda_k\}$  such that  $0 < \lambda_1 \leq \dots \leq \lambda_k$ , then  $\text{spec}((\mathbf{L}^{\top} \mathbf{L})^{-1}) = \{1/\lambda_1, \dots, 1/\lambda_k\}$  such that  $1/\lambda_k \leq \dots \leq 1/\lambda_1$ . Hence,  $\left\| (\mathbf{L}^{\top} \mathbf{L})^{-1} \right\|_2 = \max \left\{ \text{spec}((\mathbf{L}^{\top} \mathbf{L})^{-1}) \right\} = 1/\lambda_1 = 1/\lambda_{\min}(\mathbf{L}^{\top} \mathbf{L})$ . Noticing that  $\text{spec}(\mathbf{L}^{\top} \mathbf{L}) = \text{spec}(\mathbf{L} \mathbf{L}^{\top})$ , we recognize  $\left\| (\mathbf{L}^{\top} \mathbf{L})^{-1} \right\|_2 = 1/\lambda_{\min}(\mathbf{L} \mathbf{L}^{\top}) \leq 1/p$ . Therefore

$$\left\| \mathbf{L}^+ \right\|_2 \leq \frac{1}{p} \left\| \mathbf{L} \right\|_{\text{F}}. \quad (18)$$

Plugging the results of Eq. (18) into Eq. (17), we arrive at

$$\left\| \mathbf{s}_{t_j}|_{\hat{\boldsymbol{\theta}}_r} \right\|_2 \leq \frac{1}{p} \left\| \mathbf{L}|_{\hat{\boldsymbol{\theta}}_r} \right\|_{\text{F}} \max_{t_k \in \mathcal{L}_{r-1}} \left\{ \left\| \mathbf{A}_{t_k}^+ \right\|_2 \left( \left\| \mathbf{b}_{t_k} \right\|_2 + \mathbf{c}_{\max} \right) \right\}. \quad (19)$$

Finally, since  $\hat{\boldsymbol{\theta}}_r$  satisfies the constraints, we note that  $\left\| \mathbf{L} \Big|_{\hat{\boldsymbol{\theta}}_r} \right\|_F^2 \leq q \times d$ . Consequently,

$$\left\| \nabla_{\boldsymbol{\theta}} l_{t_j}(\boldsymbol{\theta}) \Big|_{\hat{\boldsymbol{\theta}}_r} \right\|_2^2 \leq \left\| \nabla_{\boldsymbol{\alpha}_{t_j}} l_{t_j}(\boldsymbol{\theta}) \Big|_{\hat{\boldsymbol{\theta}}_r} \right\|_2^2 \left( q \times d \left( \frac{2d}{p^2} \max_{t_k \in \mathcal{I}_{r-1}} \left\{ \left\| \mathbf{A}_{t_k}^\dagger \right\|_2^2 \left( \|\mathbf{b}_{t_k}\|_2^2 + \mathbf{c}_{\max}^2 \right) \right\} + 1 \right) \right).$$

□

**Lemma 3.** The  $L_2$  norm of the constraint solution at round  $r - 1$ ,  $\|\hat{\boldsymbol{\theta}}_r\|_2^2$  is bounded by

$$\|\hat{\boldsymbol{\theta}}_r\|_2^2 \leq q \times d \left[ 1 + |\mathcal{I}_{r-1}| \frac{1}{p^2} \max_{t_k \in \mathcal{I}_{r-1}} \left\{ \left\| \mathbf{A}_{t_k}^\dagger \right\|_2^2 \left( \|\mathbf{b}_{t_k}\|_2 + \mathbf{c}_{\max} \right)^2 \right\} \right].$$

with  $|\mathcal{I}_{r-1}|$  being the cardinality of  $\mathcal{I}_{r-1}$  representing the number of different tasks observed so-far.

*Proof.* Noting that  $\hat{\boldsymbol{\theta}}_r = \left[ \underbrace{\boldsymbol{\theta}_1, \dots, \boldsymbol{\theta}_{dk}}_{\mathbf{L} \Big|_{\hat{\boldsymbol{\theta}}_r}}, \underbrace{\boldsymbol{\theta}_{dk+1}, \dots, \dots}_{\mathbf{s}_{i_1} \Big|_{\hat{\boldsymbol{\theta}}_r}}, \dots, \underbrace{\boldsymbol{\theta}_{dk+kT^*}}_{\text{O's: unobserved tasks}} \right]^\top$ , it is easy to see

$$\begin{aligned} \|\hat{\boldsymbol{\theta}}_r\|_2^2 &\leq \left\| \mathbf{L} \Big|_{\hat{\boldsymbol{\theta}}_r} \right\|_F^2 + |\mathcal{I}_{r-1}| \max_{t_k \in \mathcal{I}_{r-1}} \left\{ \left\| \mathbf{s}_{t_k} \Big|_{\hat{\boldsymbol{\theta}}_r} \right\|_2^2 \right\} \\ &\leq q \times d + |\mathcal{I}_{r-1}| \max_{t_k \in \mathcal{I}_{r-1}} \left[ \frac{q \times d}{p^2} \left\| \mathbf{A}_{t_k}^\dagger \right\|_2^2 \left( \|\mathbf{b}_{t_k}\|_2 + \mathbf{c}_{\max} \right)^2 \right] \\ &\leq q \times d \left[ 1 + |\mathcal{I}_{r-1}| \frac{1}{p^2} \max_{t_k \in \mathcal{I}_{r-1}} \left\{ \left\| \mathbf{A}_{t_k}^\dagger \right\|_2^2 \left( \|\mathbf{b}_{t_k}\|_2 + \mathbf{c}_{\max} \right)^2 \right\} \right]. \end{aligned}$$

□

**Lemma 4.** The  $L_2$  norm of the linearizing term of  $l_{t_j}(\boldsymbol{\theta})$  around  $\hat{\boldsymbol{\theta}}_r$ ,  $\left\| \hat{\mathbf{f}}_{t_j} \Big|_{\hat{\boldsymbol{\theta}}_r} \right\|_2$ , is bounded by

$$\left\| \hat{\mathbf{f}}_{t_j} \Big|_{\hat{\boldsymbol{\theta}}_r} \right\|_2 \leq \left\| \nabla_{\boldsymbol{\theta}} l_{t_j}(\boldsymbol{\theta}) \Big|_{\hat{\boldsymbol{\theta}}_r} \right\|_2 \left( 1 + \|\hat{\boldsymbol{\theta}}_r\|_2 \right) + \left| l_{t_j}(\boldsymbol{\theta}) \Big|_{\hat{\boldsymbol{\theta}}_r} \right| \leq \gamma_1(r) \left( 1 + \gamma_2(r) \right) + \delta_{l_{t_j}},$$

with  $\delta_{l_{t_j}}$  being the constant upper-bound on  $\left| l_{t_j}(\boldsymbol{\theta}) \Big|_{\hat{\boldsymbol{\theta}}_r} \right|$ , and

$$\begin{aligned} \gamma_1(r) &= \frac{1}{n_{t_j} \sigma_{t_j}^2} \left[ \left( u_{\max} + \max_{t_k \in \mathcal{I}_{r-1}} \left\{ \left\| \mathbf{A}_{t_k}^\dagger \right\|_2 \left( \|\mathbf{b}_{t_k}\|_2 + \mathbf{c}_{\max} \right) \right\} \Phi_{\max} \right) \Phi_{\max} \right] \\ &\quad \times \left( d/p \sqrt{2q} \sqrt{\max_{t_k \in \mathcal{I}_{r-1}} \left\{ \left\| \mathbf{A}_{t_k}^\dagger \right\|_2^2 \left( \|\mathbf{b}_{t_k}\|_2^2 + \mathbf{c}_{\max}^2 \right) \right\}} + \sqrt{qd} \right). \\ \gamma_2(r) &\leq \sqrt{q \times d} + \sqrt{|\mathcal{I}_{r-1}|} \sqrt{\left[ 1 + \frac{1}{p^2} \max_{t_k \in \mathcal{I}_{r-1}} \left\{ \left\| \mathbf{A}_{t_k}^\dagger \right\|_2^2 \left( \|\mathbf{b}_{t_k}\|_2 + \mathbf{c}_{\max} \right)^2 \right\} \right]}. \end{aligned}$$

*Proof.* We have previously shown that  $\left\| \hat{\mathbf{f}}_{t_j} \Big|_{\hat{\boldsymbol{\theta}}_r} \right\|_2 \leq \left\| \nabla_{\boldsymbol{\theta}} l_{t_j}(\boldsymbol{\theta}) \Big|_{\hat{\boldsymbol{\theta}}_r} \right\|_2 + \left| l_{t_j}(\hat{\boldsymbol{\theta}}_r) \right| + \left\| \nabla_{\boldsymbol{\theta}} l_{t_j}(\boldsymbol{\theta}) \Big|_{\hat{\boldsymbol{\theta}}_r} \right\|_2 \times \left\| \hat{\boldsymbol{\theta}}_r \right\|_2$ . Using

the previously derived lemmas we can upper-bound  $\left\| \hat{\mathbf{f}}_{t_j} \Big|_{\hat{\boldsymbol{\theta}}_r} \right\|_2$  as follows

$$\begin{aligned} \left\| \nabla_{\boldsymbol{\theta}} l_{t_j}(\boldsymbol{\theta}) \Big|_{\hat{\boldsymbol{\theta}}_r} \right\|_2^2 &\leq \left\| \nabla_{\boldsymbol{\alpha}_{t_j}} l_{t_j}(\boldsymbol{\theta}) \Big|_{\hat{\boldsymbol{\theta}}_r} \right\|_2^2 \left( q \times d \left( \frac{2d}{p^2} \max_{t_k \in \mathcal{I}_{r-1}} \left\{ \left\| \mathbf{A}_{t_k}^\dagger \right\|_2^2 \left( \|\mathbf{b}_{t_k}\|_2^2 + \mathbf{c}_{\max}^2 \right) \right\} + 1 \right) \right) \\ \left\| \nabla_{\boldsymbol{\theta}} l_{t_j}(\boldsymbol{\theta}) \Big|_{\hat{\boldsymbol{\theta}}_r} \right\|_2 &\leq \left\| \nabla_{\boldsymbol{\alpha}_{t_j}} l_{t_j}(\boldsymbol{\theta}) \Big|_{\hat{\boldsymbol{\theta}}_r} \right\|_2 \left( d/p \sqrt{2q} \sqrt{\max_{t_k \in \mathcal{I}_{r-1}} \left\{ \left\| \mathbf{A}_{t_k}^\dagger \right\|_2^2 \left( \|\mathbf{b}_{t_k}\|_2^2 + \mathbf{c}_{\max}^2 \right) \right\}} + \sqrt{qd} \right) \\ &\leq \frac{1}{n_{t_j} \sigma_{t_j}^2} \left[ \left( u_{\max} + \max_{t_k \in \mathcal{I}_{r-1}} \left\{ \left\| \mathbf{A}_{t_k}^\dagger \right\|_2 \left( \|\mathbf{b}_{t_k}\|_2 + \mathbf{c}_{\max} \right) \right\} \Phi_{\max} \right) \Phi_{\max} \right] \\ &\quad \times \left( d/p \sqrt{2q} \sqrt{\max_{t_k \in \mathcal{I}_{r-1}} \left\{ \left\| \mathbf{A}_{t_k}^\dagger \right\|_2^2 \left( \|\mathbf{b}_{t_k}\|_2^2 + \mathbf{c}_{\max}^2 \right) \right\}} + \sqrt{qd} \right). \end{aligned}$$

Further,

$$\begin{aligned} \left\| \hat{\boldsymbol{\theta}}_r \right\|_2^2 &\leq q \times d + |\mathcal{I}_{r-1}| \max_{t_k \in \mathcal{I}_{r-1}} \left[ 1 + \frac{1}{p^2} \max_{t_k \in \mathcal{I}_{r-1}} \left\{ \left\| \mathbf{A}_{t_k}^\dagger \right\|_2^2 \left( \|\mathbf{b}_{t_k}\|_2 + \mathbf{c}_{\max} \right)^2 \right\} \right] \\ \Rightarrow \left\| \hat{\boldsymbol{\theta}}_r \right\|_2 &\leq \sqrt{q \times d} + \sqrt{|\mathcal{I}_{r-1}|} \sqrt{\left[ 1 + \frac{1}{p^2} \max_{t_k \in \mathcal{I}_{r-1}} \left\{ \left\| \mathbf{A}_{t_k}^\dagger \right\|_2^2 \left( \|\mathbf{b}_{t_k}\|_2 + \mathbf{c}_{\max} \right)^2 \right\} \right]}. \end{aligned}$$

Therefore

$$\begin{aligned} \left\| \hat{\mathbf{f}}_{t_j} \Big|_{\hat{\boldsymbol{\theta}}_r} \right\| &\leq \left\| \nabla_{\boldsymbol{\theta}} l_{t_j}(\boldsymbol{\theta}) \Big|_{\hat{\boldsymbol{\theta}}_r} \right\|_2 \left( 1 + \left\| \hat{\boldsymbol{\theta}}_r \right\|_2 \right) + \left| l_{t_j}(\boldsymbol{\theta}) \Big|_{\hat{\boldsymbol{\theta}}_r} \right| \\ &\leq \gamma_1(r) (1 + \gamma_2(r)) + \delta_{l_{t_j}}, \end{aligned} \tag{20}$$

with  $\delta_{l_{t_j}}$  being the constant upper-bound on  $\left| l_{t_j}(\boldsymbol{\theta}) \Big|_{\hat{\boldsymbol{\theta}}_r} \right|$ , and

$$\begin{aligned} \gamma_1(r) &= \frac{1}{n_{t_j} \sigma_{t_j}^2} \left[ \left( u_{\max} + \max_{t_k \in \mathcal{I}_{r-1}} \left\{ \left\| \mathbf{A}_{t_k}^\dagger \right\|_2 \left( \|\mathbf{b}_{t_k}\|_2 + \mathbf{c}_{\max} \right) \right\} \Phi_{\max} \right) \Phi_{\max} \right] \\ &\quad \times \left( d/p \sqrt{2q} \sqrt{\max_{t_k \in \mathcal{I}_{r-1}} \left\{ \left\| \mathbf{A}_{t_k}^\dagger \right\|_2^2 \left( \|\mathbf{b}_{t_k}\|_2^2 + \mathbf{c}_{\max}^2 \right) \right\}} + \sqrt{qd} \right). \\ \gamma_2(r) &\leq \sqrt{q \times d} + \sqrt{|\mathcal{I}_{r-1}|} \sqrt{\left[ 1 + \frac{1}{p^2} \max_{t_k \in \mathcal{I}_{r-1}} \left\{ \left\| \mathbf{A}_{t_k}^\dagger \right\|_2^2 \left( \|\mathbf{b}_{t_k}\|_2 + \mathbf{c}_{\max} \right)^2 \right\} \right]}. \end{aligned}$$

□

**Theorem 1** (Sublinear Regret; restated from the main paper). *After  $R$  rounds and choosing  $\eta_{t_1} = \dots = \eta_{t_j} = \eta = \frac{1}{\sqrt{R}}$ ,  $\mathbf{L} \Big|_{\hat{\boldsymbol{\theta}}_1} = \text{diag}_k(\zeta)$ , with  $\text{diag}_k(\cdot)$  being a diagonal matrix among the  $k$  columns of  $\mathbf{L}$ ,  $p \leq \zeta^2 \leq q$ , and  $\mathbf{S} \Big|_{\hat{\boldsymbol{\theta}}_1} = \mathbf{0}_{k \times |\mathcal{T}|}$ , for any  $\mathbf{u} \in \mathcal{K}$  our algorithm exhibits a sublinear regret of the form*

$$\sum_{j=1}^R l_{t_j}(\hat{\boldsymbol{\theta}}_r) - l_{t_j}(\mathbf{u}) = \mathcal{O}(\sqrt{R}).$$

*Proof.* Given the ingredients of the previous section, next we derive the sublinear regret results which finalize the statement of the theorem. First, it is easy to see that

$$\nabla_{\boldsymbol{\theta}} \Omega_0(\tilde{\boldsymbol{\theta}}_j) - \nabla_{\boldsymbol{\theta}} \Omega_0(\tilde{\boldsymbol{\theta}}_{j+1}) = \eta_{t_j} \hat{\mathbf{f}}_{t_j} \Big|_{\hat{\boldsymbol{\theta}}_j}.$$

Further, from strong convexity of the regularizer we obtain:

$$\Omega_0(\hat{\boldsymbol{\theta}}_j) \geq \Omega_0(\hat{\boldsymbol{\theta}}_{j+1}) + \left\langle \nabla_{\boldsymbol{\theta}} \Omega_0(\hat{\boldsymbol{\theta}}_{j+1}), \hat{\boldsymbol{\theta}}_j - \hat{\boldsymbol{\theta}}_{j+1} \right\rangle + \frac{1}{2} \left\| \hat{\boldsymbol{\theta}}_j - \hat{\boldsymbol{\theta}}_{j+1} \right\|_2^2.$$

It can be seen that

$$\left\| \hat{\boldsymbol{\theta}}_j - \hat{\boldsymbol{\theta}}_{j+1} \right\|_2 \leq \eta_{t_j} \left\| \hat{\mathbf{f}}_{t_j} \Big|_{\hat{\boldsymbol{\theta}}_j} \right\|_2.$$

Finally, for any  $\mathbf{u} \in \mathcal{K}$ , we have:

$$\sum_{j=1}^r \eta_{t_j} \left( l_{t_j}(\hat{\boldsymbol{\theta}}_j) - l_{t_j}(\mathbf{u}) \right) \leq \sum_{j=1}^r \left[ \eta_{t_j} \left( \left\| \hat{\mathbf{f}}_{t_j} \Big|_{\hat{\boldsymbol{\theta}}_j} \right\|_2 \right)^2 \right] + \boldsymbol{\Omega}_0(\mathbf{u}) - \boldsymbol{\Omega}_0(\hat{\boldsymbol{\theta}}_1) .$$

Assuming  $\eta_{t_1} = \dots = \eta_{t_j} = \eta$ , we can derive

$$\sum_{j=1}^r \left( l_{t_j}(\hat{\boldsymbol{\theta}}_j) - l_{t_j}(\mathbf{u}) \right) \leq \eta \sum_{j=1}^r \left( \left\| \hat{\mathbf{f}}_{t_j} \Big|_{\hat{\boldsymbol{\theta}}_j} \right\|_2 \right)^2 + 1/\eta \left( \boldsymbol{\Omega}_0(\mathbf{u}) - \boldsymbol{\Omega}_0(\hat{\boldsymbol{\theta}}_1) \right) .$$

The following lemma finalizes the statement of the theorem:

**Lemma 5.** *After  $T$  rounds and for  $\eta_{t_1} = \dots = \eta_{t_j} = \eta = \frac{1}{\sqrt{R}}$ , our algorithm exhibits, for any  $\mathbf{u} \in \mathcal{K}$ , a sublinear regret of the form*

$$\sum_{j=1}^R l_{t_j}(\hat{\boldsymbol{\theta}}_j) - l_{t_j}(\mathbf{u}) \leq \mathcal{O}(\sqrt{R}) .$$

*Proof.* It is then easy to see

$$\begin{aligned} \left\| \hat{\mathbf{f}}_{t_j} \Big|_{\hat{\boldsymbol{\theta}}_r} \right\|_2^2 &\leq \gamma_3(R) + 4\gamma_1^2(R)\gamma_2^2(R) \quad \text{with} \quad \gamma_3(R) = 4\gamma_1^2(R) + 2 \max_{t_j \in \mathcal{I}_{R-1}} \delta_{t_j}^2 \\ &\leq \gamma_3(R) + 8 \frac{d}{p^2} \gamma_1^2(R) q d + 8 \frac{d}{p^2} \gamma_1^2(R) q d |\mathcal{I}_{R-1}| \max_{t_k \in \mathcal{I}_{R-1}} \left\{ \|\mathbf{A}_{t_k}^\dagger\|_2 (\|\mathbf{b}_{t_k}\|_2 + \mathbf{c}_{\max})^2 \right\} . \end{aligned}$$

Since  $|\mathcal{I}_{R-1}| \leq |\mathcal{T}|$  with  $|\mathcal{T}|$  being the total number of tasks available, then we can write

$$\left\| \hat{\mathbf{f}}_{t_j} \Big|_{\hat{\boldsymbol{\theta}}_r} \right\|_2^2 \leq \gamma_5(R) |\mathcal{T}| ,$$

with  $\gamma_5 = 8d/p^2 q \gamma_1^2(R) \max_{t_k \in \mathcal{I}_{R-1}} \left\{ \|\mathbf{A}_{t_k}^\dagger\|_2 (\|\mathbf{b}_{t_k}\|_2 + \mathbf{c}_{\max})^2 \right\}$ . Further, it is easy to see that  $\boldsymbol{\Omega}_0(\mathbf{u}) \leq qd + \gamma_5(R) |\mathcal{T}|$  with  $\gamma_5(R)$  being a constant, which leads to

$$\sum_{j=1}^r \left( l_{t_j}(\hat{\boldsymbol{\theta}}_j) - l_{t_j}(\mathbf{u}) \right) \leq \eta \sum_{j=1}^r \gamma_5(R) |\mathcal{T}| + 1/\eta \left( qd + \gamma_5(R) |\mathcal{T}| - \boldsymbol{\Omega}_0(\hat{\boldsymbol{\theta}}_1) \right) .$$

**Initializing  $\mathbf{L}$  and  $\mathbf{S}$ :** We initialize  $\mathbf{L} \Big|_{\hat{\boldsymbol{\theta}}_1} = \text{diag}_k(\zeta)$ , with  $p \leq \zeta^2 \leq q$  and  $\mathbf{S} \Big|_{\hat{\boldsymbol{\theta}}_1} = \mathbf{0}_{k \times |\mathcal{T}|}$  ensures the invertability of  $\mathbf{L}$  and that the constraints are met. This leads us to

$$\sum_{j=1}^r \left( l_{t_j}(\hat{\boldsymbol{\theta}}_j) - l_{t_j}(\mathbf{u}) \right) \leq \eta \sum_{j=1}^r \gamma_5(R) |\mathcal{T}| + 1/\eta (qd + \gamma_5(R) |\mathcal{T}| - \mu_2 k \zeta) .$$

Choosing  $\eta_{t_1} = \dots = \eta_{t_j} = \eta = 1/\sqrt{R}$ , we acquire sublinear regret, finalizing the statement of the theorem:

$$\begin{aligned} \sum_{j=1}^r \left( l_{t_j}(\hat{\boldsymbol{\theta}}_j) - l_{t_j}(\mathbf{u}) \right) &\leq 1/\sqrt{R} \gamma_5(R) |\mathcal{T}| R + \sqrt{R} (qd + \gamma_5(R) |\mathcal{T}| - \mu_2 k \zeta) \\ &\leq \sqrt{R} (\gamma_5(R) |\mathcal{T}| + qd \gamma_5(R) |\mathcal{T}| - \mu_2 k \zeta) \leq \mathcal{O}(\sqrt{R}) , \end{aligned}$$

with  $\gamma_5(R)$  being a constant. □

□

□
